# Supplementary material for: Modification of polycarbosilane by polyborazine as a precursor for oxygen-free SiC fibersElectronic supplementary information (ESI) available: DSC thermograms; molecular weight distributions; chromatograms of hydrogen evolution; 29Si NMR spectra. See http://www.rsc.org/suppdata/jm/b3/b303573e/
Source: Royal Society of Chemistry journal article supplement (doi:10.1039/b303573e), 2003-01-01
Supplement: b303573e.pdf [file b303573e.pdf]

# **Modification of Polycarbosilane by Polyborazine as a Precursor for Oxygen-free SiC Fibers**

<sup>1</sup>Feng Cao<sup>†</sup>, <sup>1</sup>Xiao-dong Li, <sup>2</sup>Jae-ho Ryu and <sup>2</sup>Dong-pyo Kim\*

<sup>1</sup>Key Lab of Ceramic Fiber and Composites, National University of Defense Technology,  
Changsha, 410073, P.R. China

<sup>2</sup>Department of Fine Chemical Engineering and Chemistry, Chungnam National University,  
Taejon, 305-764, Korea  
dpkim@cnu.ac.kr, FAX: 82-42-823-6665

<sup>†</sup> Worked at Prof. Kim's laboratory under co-advisor system.

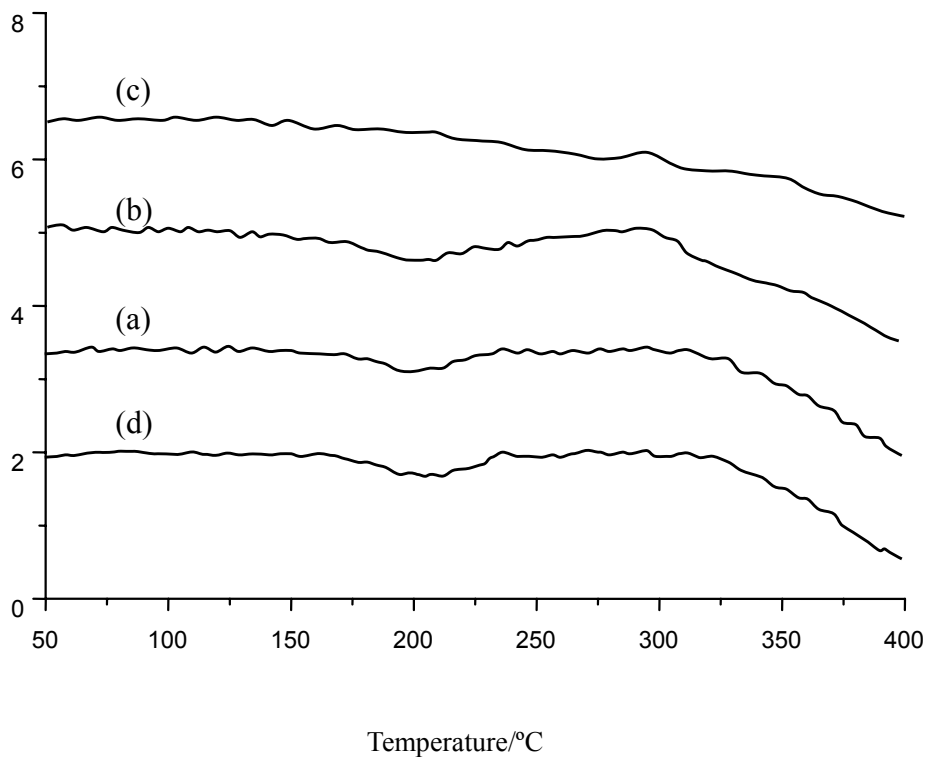

**Supplemental Fig. 1.** DSC of (a) PCS feed stock, (b) mixture of PCS and 1wt.%PBN, and (c) PCS modified by 1wt.% PBN at 300°C for 1hr, (d) PCS heated at 300°C for 1hr without PBN.

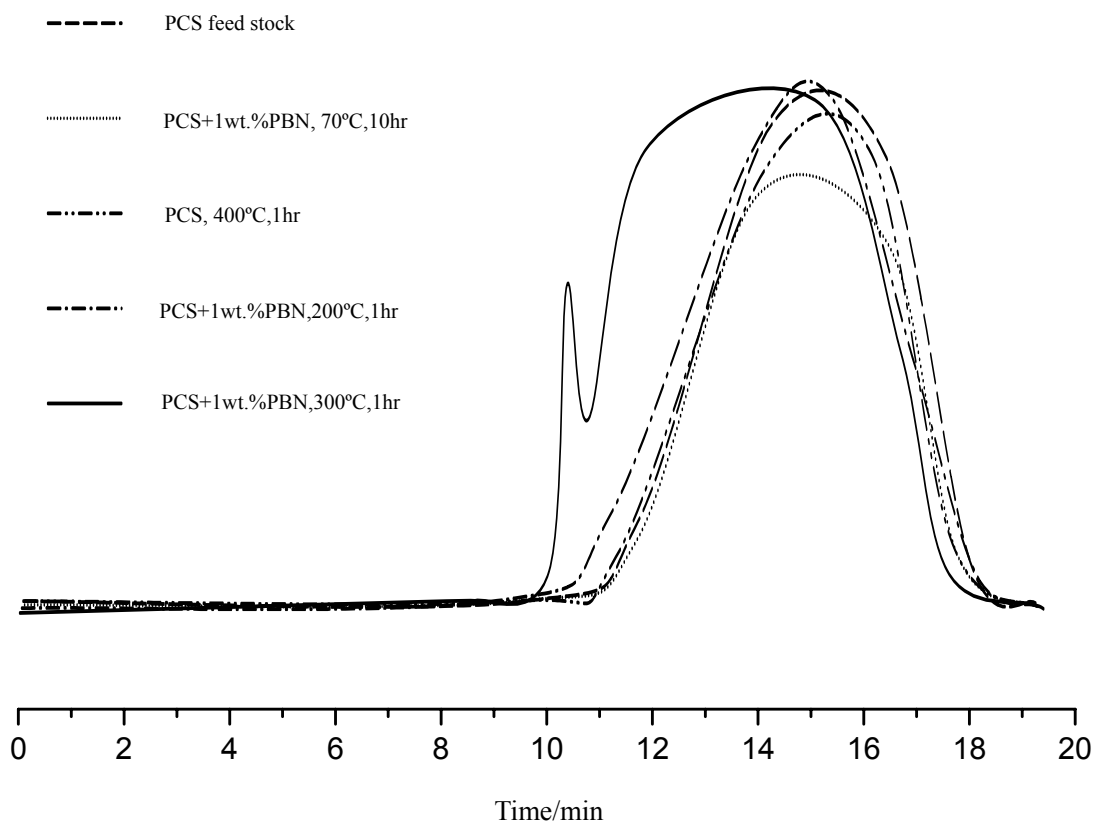

**Supplemental Fig. 2** Molecular weight distribution for various PCS

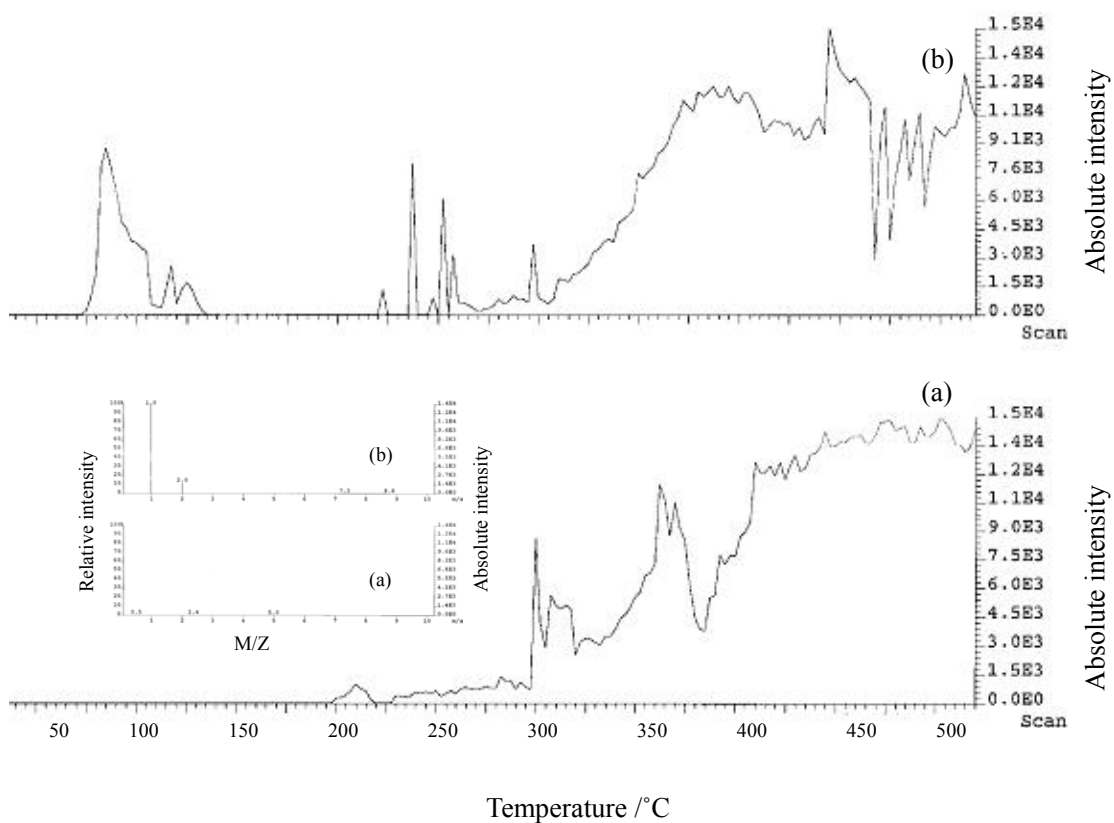

**Supplemental Fig. 3** Chromatogram of the hydrogen evolved from (a) PCS feed stock and (b) treated PCS with 1wt.% of PBN, respectively, as heated to 500°C. Insert: average mass spectrum of the gases evolved in the temperature range 75-140°C by samples (a) and (b), respectively.

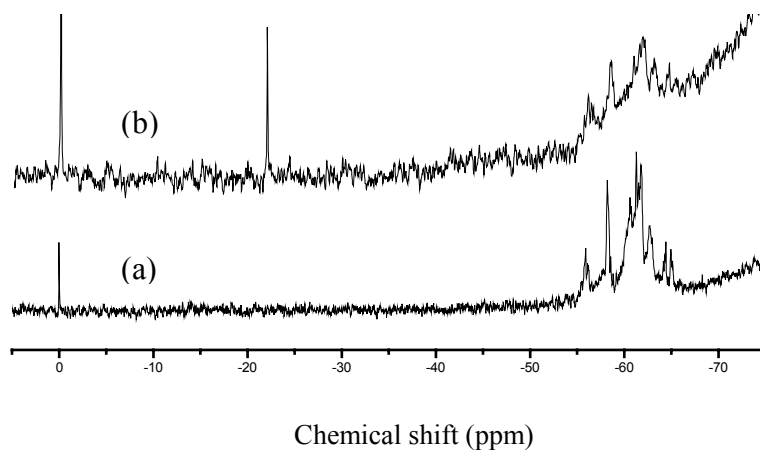

**Supplemental Fig. 4**  $^{29}\text{Si}$ -NMR spectra of polyphenylsilane (a) feed stock and (b) treated with 1 wt% PBN at 200°C for 4 hr.

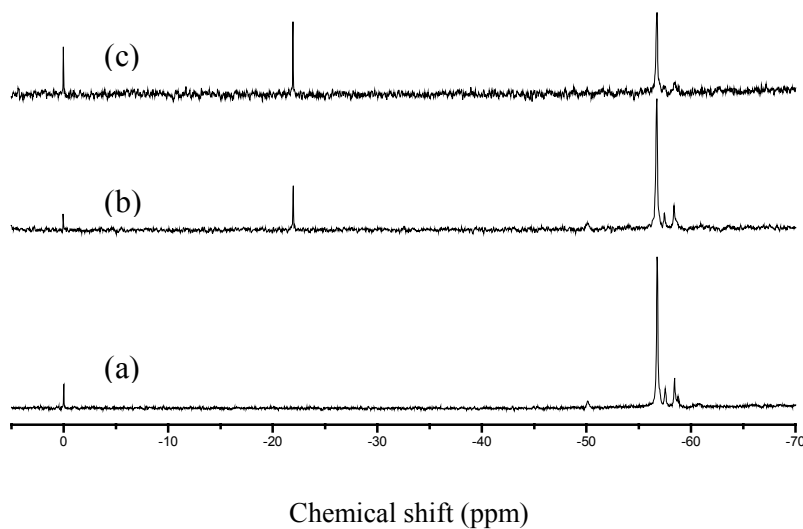

**Supplemental Figure 5**  $^{29}\text{Si}$ -NMR spectra of Polyvinylsilane (a) feed stock, (b) treated with 1 wt% PBN at 70°C for 10 hr and (c) treated with 1 wt% PBN at 300°C for 1 hr.

**Reference (42)** L. Y. Hong, F. Cao, D. J. Kim, H. G. Woo, B. H. Kim, M. S. Cho, X. D. Li and D. P. Kim, unpublished data, 2002.
